# Supplementary material for: Air-assisted ionic liquid dispersive liquid–liquid microextraction based on solidification of the aqueous phase for the determination of triazole fungicides in water samples by high-performance liquid chromatography
Source: Royal Society of Chemistry journal article supplement (doi:10.1039/c9ra07348e), 2019-01-01
Supplement: c9ra07348e1.pdf [file c9ra07348e1.pdf]

1 Supporting material

2 **Air-assisted ionic liquid dispersive liquid-liquid microextraction**  
3 **based on solidification of aqueous phase for the determination of**  
4 **triazole fungicides in water samples by high-performance liquid**  
5 **chromatography**

6

7 Liyan Jia<sup>1</sup>, Jingrui Yang<sup>2</sup>, Wenfei Zhao<sup>1</sup>, and Xu Jing<sup>1\*</sup>

8

9 <sup>1</sup> *College of Food Science and Engineering, Shanxi Agricultural University, Taigu,*

10 *Shanxi 030801, P.R. China*

11 <sup>2</sup> *State Key Laboratory of Food Science and Technology, Nanchang University,*

12 *Nanchang, Jiangxi 330047, China*

13

14

15 \*Corresponding author: Xu Jing, College of Food Science and Engineering, Shanxi

16 Agricultural University, Shanxi 030801, P.R. China; Tel: +86-0354-6288325; E-mail:

17 x.jing@vip.163.com

18

19

20 Number of pages: 2

21 Number of figures: 1

22

23

24

25

26

27

28

29

30

31

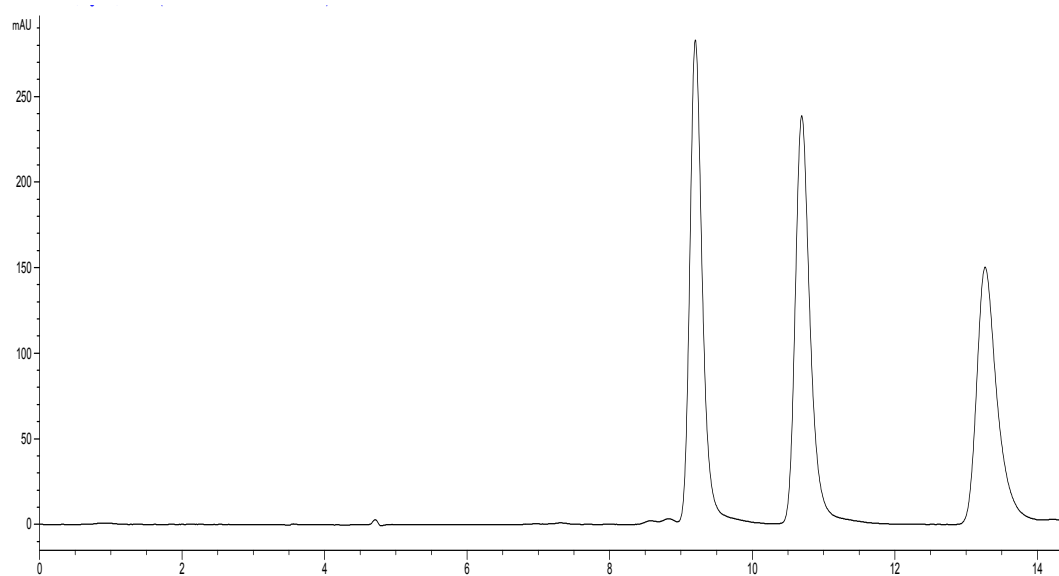

32

33 **Fig. S1.** HPLC Chromatograms of myclobutanil (9.3 min), epoxiconazole (10.8 min),

34

and tebuconazole (13.4 min).
